# Supplementary material
Source: Springer Nature journal article supplement (https://www.springermedizin.de/resource/supplementary/12889_2013_6542_MOESM1_ESM.pdf/9498206)
Supplement: MOESM1 [file 9498206]

## Overview of Men's Discussion Groups curriculum

### Gender and violence against women and girls

- Men as role models
- Impact of gender on societal expectations and generational differences
- Understanding gender equity, sexual rights, privileges and restrictions, power and violence

### Violence and its impact

- Understanding types, experiences and consequences of violence on self and others (women, girls, men, boys, community). Violence includes intimate partner violence, non-partner violence and conflict-related violence.
- Sexual violence – consent and coercion
- Supporting survivors of violence

### Healthy choices and relationships

- Healthy and unhealthy relationships between men and women
- Respect in intimate relationships
- Conflict and hostility management skills
- Understanding and practicing behaviour change

## Stages of change

Unaware

Aware

Concerned

Knowledgeable

Test behaviour change

Practice sustained behaviour change
